# Supplementary material for: Improving in-silico normalization using read weights
Source: Springer Nature journal article supplement (doi:10.1038/s41598-019-41502-9), 2019-03-26
Supplement: MOESM1 [file 41598_2019_41502_MOESM1_ESM.pdf]

Supplementary material for the manuscript:  
**Improving *in-silico* normalization using read weights**  
Dilip A Durai and Marcel H Schulz

**Normalization parameters**

Table S1: Parameters used for different normalization algorithms. ORNA-Q, ORNA-K and ORNA requires base  $b$  of the logarithm function. Diginorm and Bignorm requires a coverage cut-off value  $c$  and quality score cutoff  $q$  respectively. The first column contains the datasets used for the algorithms. A star next to the value indicates the default coverage/base of the algorithm.

| Dataset | ORNA-K(b)        | ORNA-Q(b)           | ORNA(b)             | Diginorm(c)      | Bignorm(q)       |
|---------|------------------|---------------------|---------------------|------------------|------------------|
| Brain   | (1.7*,3,5,7,9)   | (1.3,1.7*,3,5,7,11) | (1.3,1.7*,3,5,7,9)  | (5,10*,15,20,25) | (5,10,15,20*,25) |
| HeLa    | (1.3,1.7*,3,5,7) | (1.3,1.5,5,7,9)     | (1.3,1.5,2,3,5,7,9) | (5,10*,15,20,25) | (1,5,10,15,20*)  |

Table S2: Command lines used for Bignorm and Diginorm for calculation of memory and runtime requirements.

| Algorithm             | Input Dataset    | Command                                                                |
|-----------------------|------------------|------------------------------------------------------------------------|
| Bignorm <sup>a</sup>  | Brain(SRR332171) | Bignorm -Q 10 -k 22                                                    |
| Diginorm <sup>a</sup> | Brain(SRR332171) | normalization-by-median.py -C 10 -n_hashes 4 -ksize 22 -hashsize 32e+8 |
| Bignorm <sup>b</sup>  | HeLa(SRR317049)  | Bignorm -Q 10 -k 22 -m 512 -t 10                                       |
| Diginorm <sup>b</sup> | HeLa(SRR317049)  | normalization-by-median.py -C 10 -n_hashes 2 -ksize 22 -hashsize 32e+8 |

**Weights in the Hela dataset**

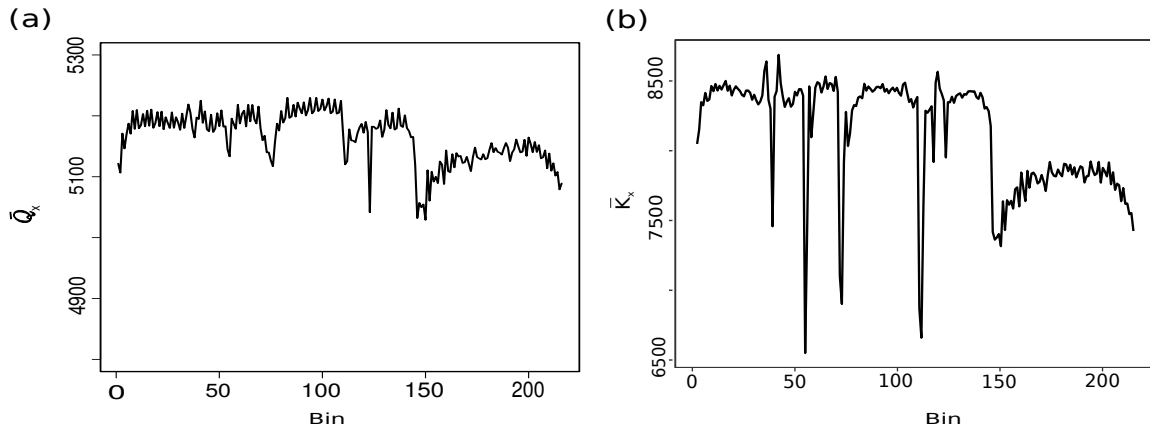

Figure S1: The position-wise distribution of (a) average phred quality based weight and (b) average label abundance weight in the HeLa dataset
